# Supplementary material
Source: PubMed Central journal article supplement (PMC3516593)
Supplement: mmc1.pdf [file mmc1.pdf]

## Supplemental Data

### Exome Sequencing Reveals De Novo

### WDR45 Mutations Causing a Phenotypically

### Distinct, X-Linked Dominant Form of NBIA

Tobias B. Haack, Penelope Hogarth, Michael C. Kruer, Allison Gregory, Thomas Wieland, Thomas Schwarzmayr, Elisabeth Graf, Lynn Sanford, Esther Meyer, Eleanna Kara, Stephan M. Cuno, Sami I. Harik, Vasuki H. Dandu, Nardo Nardocci, Giovanna Zorzi, Todd Dunaway, Mark Tarnopolsky, Steven Skinner, Steven Frucht, Era Hanspal, Connie Schrandner-Stumpel, Delphine Héron, Cyril Mignot, Barbara Garavaglia, Kailash Bhatia, John Hardy, Tim M. Strom, Nathalie Boddaert, Henry H. Houlden, Manju A. Kurian, Thomas Meitinger, Holger Prokisch, and Susan J. Hayflick

**Supplemental Table 1. Sequencing Statistics**

| Patient ID     | Reads              | Mapped Reads      | Percent      | Mapped Sequence (Gb) | Reads Overlapping Target | Target Bases |              |              | Average Coverage |
|----------------|--------------------|-------------------|--------------|----------------------|--------------------------|--------------|--------------|--------------|------------------|
|                |                    |                   |              |                      |                          | >1x          | >8x          | >20x         |                  |
| #60251         | 97,206,974         | 93,571,072        | 96.26        | 9.82                 | 69.83                    | 99.64        | 97.47        | 93.16        | 103.31           |
| #63700         | 83,978,185         | 82,704,872        | 98.48        | 8.48                 | 78.95                    | 99.54        | 96.77        | 91.74        | 105.02           |
| #63701         | 104,714,028        | 102,878,906       | 98.25        | 10.58                | 77.4                     | 99.53        | 96.90        | 92.58        | 126.86           |
| #63702         | 97,994,022         | 96,369,023        | 98.34        | 9.90                 | 77.73                    | 99.54        | 97.02        | 92.67        | 119.39           |
| #63703         | 98,730,027         | 97,062,160        | 98.31        | 9.97                 | 78.47                    | 99.58        | 97.35        | 93.10        | 121.94           |
| #63704         | 103,855,311        | 102,184,278       | 98.39        | 10.49                | 80.12                    | 99.60        | 97.48        | 93.64        | 131.38           |
| #63705         | 105,151,908        | 103,338,107       | 98.28        | 10.62                | 78.61                    | 99.60        | 97.35        | 93.36        | 130.8            |
| #63706         | 119,774,913        | 118,099,728       | 98.6         | 12.10                | 76.50                    | 99.64        | 97.57        | 93.89        | 144.49           |
| #63707         | 103,127,329        | 101,520,019       | 98.44        | 10.42                | 77.61                    | 99.61        | 97.53        | 93.67        | 126.41           |
| #63708         | 76,819,820         | 74,617,432        | 97.13        | 7.76                 | 79.42                    | 99.90        | 97.95        | 92.16        | 94.97            |
| #63709         | 103,233,138        | 101,703,042       | 98.52        | 10.43                | 77.95                    | 99.57        | 97.19        | 93.07        | 126.85           |
| #63710         | 99,932,444         | 98,094,726        | 98.16        | 10.09                | 77.31                    | 99.60        | 96.76        | 90.40        | 121.31           |
| #63711         | 106,227,473        | 104,578,095       | 98.45        | 10.73                | 77.33                    | 99.52        | 96.89        | 92.68        | 128.85           |
| #63712         | 111,916,818        | 109,971,381       | 98.26        | 11.3                 | 77.97                    | 99.60        | 97.53        | 93.85        | 137.37           |
| <b>Average</b> | <b>100,904,456</b> | <b>99,049,489</b> | <b>98.13</b> | <b>10.19</b>         | <b>77.51</b>             | <b>99.61</b> | <b>97.27</b> | <b>92.86</b> | <b>122.78</b>    |

**Supplemental Table 2. Variants Identified in 14 Individuals with BPAN by Exome Sequencing**

| <b>Patient ID</b>       | <b>#60251</b> | <b>#63700</b> | <b>#63701</b> | <b>#63702</b> | <b>#63703</b> | <b>#63704</b> | <b>#63705</b> | <b>#63706</b> | <b>#63707</b> | <b>#63708</b> | <b>#63709</b> | <b>#63710</b> | <b>#63711</b> | <b>#63712</b> |
|-------------------------|---------------|---------------|---------------|---------------|---------------|---------------|---------------|---------------|---------------|---------------|---------------|---------------|---------------|---------------|
| synonymous              | 10,391        | 10,221        | 10,411        | 12,574        | 12,422        | 11,160        | 10,602        | 10,616        | 10,523        | 10,476        | 10,553        | 10,369        | 10,331        | 10,480        |
| NSV                     | 11,332        | 11,332        | 11,465        | 14,082        | 13,898        | 12,273        | 11,758        | 11,604        | 11,532        | 11,514        | 11,482        | 11,435        | 11,518        | 11,408        |
| rare NSV                | 294           | 274           | 234           | 2,116         | 1,866         | 753           | 312           | 245           | 301           | 291           | 252           | 240           | 260           | 224           |
| genes with $\geq 2$ NSV | 6             | 13            | 8             | 392           | 345           | 70            | 10            | 6             | 17            | 12            | 10            | 7             | 10            | 7             |

Non-synonymous variants (NSV) = missense, nonsense, stoploss, splice site disruption, insertions, deletions; rare indicates a frequency <0.3% in 1429 control exomes, HapMap, and the 1000 Genomes project; bold indicates gene carrying the causal mutations.
